# Supplementary figures and images for: Preparation of stable Fe2O3/Ag nanocomposite particles with catalytic, antioxidant and antibacterial properties
Source: Royal Society of Chemistry journal article supplement (doi:10.1039/d3nj05885a), 2024-01-01

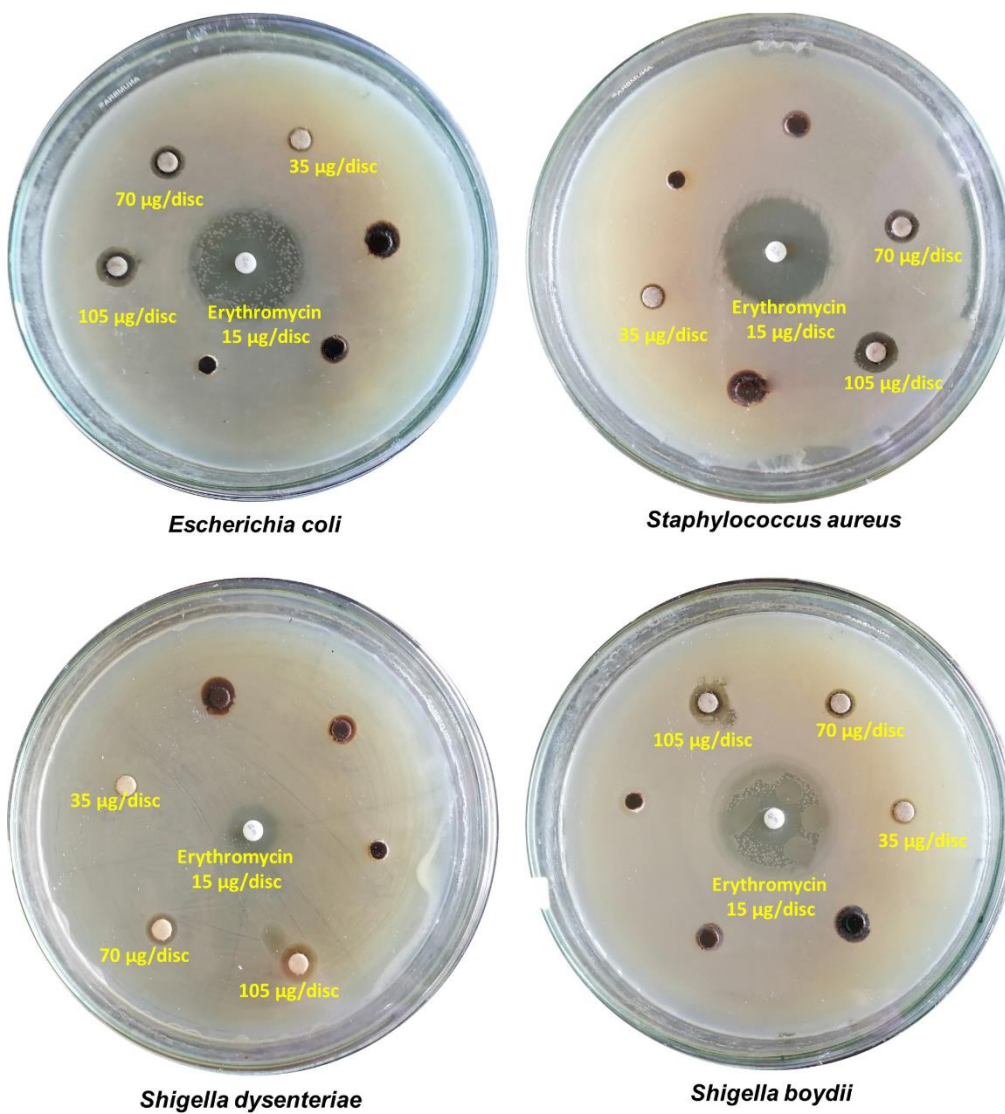

Figure: Antibacterial activity of IO/Ag nanocomposite particles.

Supplement: d3nj05885a1.pdf [file d3nj05885a1.pdf]
